# Supplementary material
Source: publisher site journal article supplement (https://www.dovepress.com/article/254677)
Supplement: Supplementary file 1 [file get_supplementary_file.php]

| **SNP_ID** | **PCRPrimer 1** | **PCR Primer 2** | **Extension Primer** |  |
| --- | --- | --- | --- | --- |
| rs1042713 | ACGTTGGATGACCCACACCTCGTCCCTTT | ACGTTGGATGGAACGGCAGCGCCTTCTTG | CCGGCGCATGGCTTC |  |
| rs1042714 | ACGTTGGATGAGACATGACGATGCCCATGC | ACGTTGGATGCCTTCTTGCTGGCACCCAAT | ACACCTCGTCCCTTT |  |
| rs1051266 | ACGTTGGATGTGAAGCCGTAGAAGCAAAGG | ACGTTGGATGAGAAGCAGGTGCCCGTGGAA | AGGTAGCACACGAGG |  |
| rs1065776 | ACGTTGGATGTGCTGTTCCCCCAGGACGAA | ACGTTGGATGAGAATGACCGAGGTGCTGTG | tTTCCCCCAGGACGAACCCGGACC |  |
| rs10929302 | ACGTTGGATGAAGCAGAAGGGCTAGAGAGG | ACGTTGGATGCTCTGCCTTGCTCTCAAAAC | tAGAGGAGGAATGAGCTT |  |
| rs1131596 | ACGTTGGATGATCTTCCAAGGTGCCCTGAC | ACGTTGGATGACCATCCTGCTCAGGCCAC | TCCTTCCAGGCACAG |  |
| rs1138272 | ACGTTGGATGGGATGATACATGGTGGTGTC | ACGTTGGATGTCAAAAGGCTTCAGTTGCCC | cGTGTCTGGCAGGAGG |  |
| rs1229984 | ACGTTGGATGGCCTAAAATCACAGGAAGGG | ACGTTGGATGTCTGTAGATGGTGGCTGTAG | ACGTGGTCATCTGTG |  |
| rs12659 | ACGTTGGATGTGCGAAACCTCGGCTTCGGA | ACGTTGGATGAGCACTGAGTCCCCACAGG | tgagaTGGAGCGCATGAATCC |  |
| rs12721634 | ACGTTGGATGGGAAAGTAGTGATGGCTCTC | ACGTTGGATGACTCACAGATAGAGGAGCAC | GGAAACCTGGCTTCTCC |  |
| rs1695 | ACGTTGGATGTGGACATGGTGAATGACGGC | ACGTTGGATGAACCCTGGTGCAGATGCTC | GACCTCCGCTGCAAATAC |  |
| rs17238540 | ACGTTGGATGTCTGGGTTTCTCTTTCTATC | ACGTTGGATGGGACACAATGGATTAGGCTG | ggTGGTCTTTTCCAAACTCTTT |  |
| rs17244841 | ACGTTGGATGCAGGTATTCAAGATACAAAG | ACGTTGGATGGGGAAACAAAGTGAGACTAC | AAGTATGATTGTAATATAAAGGATTT |  |
| rs1799853 | ACGTTGGATGCTGCGGAATTTTGGGATGG | ACGTTGGATGCAGTGATATGGAGTAGGGTC | TGGGGAAGAGGAGCATTGAGGAC |  |
| rs1800888 | ACGTTGGATGTACCAGTGCATCTGAATGGG | ACGTTGGATGTAAGGCCCGGGTGATCATTC | tTCTGAATGGGCAAGAAGGAG |  |
| rs1801131 | ACGTTGGATGGAGAGGTAAAGAACGAAGAC | ACGTTGGATGTGAAGAGCAAGTCCCCCAAG | cccccACGAAGACTTCAAAGACACTT |  |
| rs1801133 | ACGTTGGATGGAAAAGCTGCGTGATGATG | ACGTTGGATGACCTGAAGCACTTGAAGGAG | tGCTGCGTGATGATGAAATCG |  |
| rs1801272 | ACGTTGGATGAGGAGCGCATCCAGGAGGAG | ACGTTGGATGTGTTTTCCTTCTCCTGCCCC | ccccCTTCCTCATCGACGCCC |  |
| rs1805124 | ACGTTGGATGCTGTCCCTGGGCACTGGTC | ACGTTGGATGTGATGAAAACAGCACAGCGG | ggcaAGGGCACCAGCAGTGATGTG |  |
| rs2046934 | ACGTTGGATGCACTTATCTCTGGTGAAAT | ACGTTGGATGTATGGCATCTACATCTTGGG | CTGGTGAAATAAAAAGATTACAAA |  |
| rs2066702 | ACGTTGGATGCAACAAGCATGTGGGTTGTC | ACGTTGGATGCTCTATTGCCTCAAAACGTC | TCTTCTTTCCTATTGCAGTATC |  |
| rs2066853 | ACGTTGGATGAAGTCAATGTCTCTGAAGTC | ACGTTGGATGCCTAGGCATTGATTTTGAAG | gTTTTCATTCTGCATGTGT |  |
| rs2740574 | ACGTTGGATGATCAGAAACTCAAGTGGAGC | ACGTTGGATGATGAGGACAGCCATAGAGAC | TCTATTAAATCGCCTCTCTC |  |
| rs28371706 | ACGTTGGATGGCCGACCGCCCGCCTGTG | ACGTTGGATGTCCCACGGAAATCTGTCTCT | CGCCTGTGCCCATCA |  |
| rs28371725 | ACGTTGGATGTGATCCTACATCCGGATGTG | ACGTTGGATGTCCCAGCAAAGTTCATGGGC | GGAAACAGTGCAGGGGCCGAGGGAG |  |
| rs28399433 | ACGTTGGATGAATCAGCCAAAGTCCATCCC | ACGTTGGATGTGGGATGATAGATGGTGACG | gaCCTCTTTTTCAGGCAGTA |  |
| rs28399454 | ACGTTGGATGGTGATCCACGAGATCCAAAG | ACGTTGGATGTGTCCTTTTTGACTCTGCGG | ggagCGAGATCCAAAGATTTGGAGAC |  |
| rs28399499 | ACGTTGGATGGTGTATGGCATTTTGGCTCG | ACGTTGGATGTCTGTACAGAGAGAGTCTAC | ctccGTGGGCCAATCACCTGTTCA |  |
| rs3807375 | ACGTTGGATGTCCCTTAGAGAACTTCTGCG | ACGTTGGATGTCTGTCTCTATACTGGGAGG | ccctTTAGAGAACTTCTGCGTTTAGA |  |
| rs3814055 | ACGTTGGATGTCACCTGAAGACAACTGTGG | ACGTTGGATGGAGACCACGATTGAGCAAAC | ggtccTTTTTTGGCAATCCCAGGTT |  |
| rs3815459 | ACGTTGGATGTCAACAGGTGAGGGAGTGC | ACGTTGGATGTCTCCCTCTACCAGACAACA | cGGGAGTGCAGGTGGGGT |  |
| rs3846662 | ACGTTGGATGAAGGTATCACTAATTGTCC | ACGTTGGATGAGCAATAGGTGTAAGTTGGC | gcAACTCTTCTCATTGCCTTAC |  |
| rs3918290 | ACGTTGGATGAACATTCACCAACTTATGCC | ACGTTGGATGTCACTGAACTAAAGGCTGAC | gTTGTTTTAGATGTTAAATCACACTTA |  |
| rs4124874 | ACGTTGGATGGTCATAGTAAGCTGGCCAAG | ACGTTGGATGTTCTGGATCCCTTGCTGTTC | tCTGGCCAAGGGTAGAGTTCAGT |  |
| rs4148323 | ACGTTGGATGACATCCTCCCTTTGGAATGG | ACGTTGGATGCTGACGCCTCGTTGTACATC | TCAAGGTGTAAAATGCTC |  |
| rs4149056 | ACGTTGGATGAATCTGGGTCATACATGTGG | ACGTTGGATGTATGGGAGTCTCCCCTATTC | agaTGGGTCATACATGTGGATATATG |  |
| rs4244285 | ACGTTGGATGCACTTTCCATAAAAGCAAGG | ACGTTGGATGGCAATAATTTTCCCACTATC | cttcAAGTAATTTGTTATGGGTTCC |  |
| rs4680 | ACGTTGGATGTTTTCCAGGTCTGACAACGG | ACGTTGGATGACCCAGCGGATGGTGGATTT | GCACACCTTGTCCTTCA |  |
| rs4986893 | ACGTTGGATGAACATCAGGATTGTAAGCAC | ACGTTGGATGGACTGTAAGTGGTTTCTCAG | TGTAAGCACCCCCTG |  |
| rs4986909 | ACGTTGGATGCCTTCCCAGGGGCCTTGTA | ACGTTGGATGTGGTGGTGATGATTCCAAGC | cgtGGCCTTGTACCTTTCA |  |
| rs4986910 | ACGTTGGATGTACACACCCTTTGGAAGTGG | ACGTTGGATGTGAAGGACTCTGATTAGAGC | CAGAAACTGCATTGGCA |  |
| rs4986913 | ACGTTGGATGACTTGCTCTAATCAGAGTCC | ACGTTGGATGGAAAATTGACTAACCTGTG | TTCAGAACTTCTCCTTCAAA |  |
| rs5030656 | ACGTTGGATGAGACCTGACTGAGGCCTTC | ACGTTGGATGCCTCATTCCTCCTGGGACG | gggtgGGCCTTCCTGGCAGAGATGGAG |  |
| rs5219 | ACGTTGGATGCGTTGCAGTTGCCTTTCTTG | ACGTTGGATGAATACGTGCTGACACGCCTG | tCGGGCACGGTACCTGGGCT |  |
| rs59421388 | ACGTTGGATGCCGTGTCCAACAGGAGAT | ACGTTGGATGGAATCACGGCAGTGGTGTAG | ggccACAGGAGATCGACGAC |  |
| rs61736512 | ACGTTGGATGGTGTTCCTGGCGCGCTATG | ACGTTGGATGACTGCTCCAGCGACTTCTTG | GAGCAGAGGCGCTTCTCC |  |
| rs6791924 | ACGTTGGATGCTCTCCTGCAAGGTGGTTG | ACGTTGGATGAGCTTCCGCAGGTTCACAC | AGGTGGTTGAGCCGC |  |
| rs689466 | ACGTTGGATGGGAATTAATTAGATGGAAGGG | ACGTTGGATGCTGAGCACTACCCATGATAG | GAAGGGAGATTTTGACAG |  |
| rs698 | ACGTTGGATGTACCTCTTTCCAGAGCGAAG | ACGTTGGATGGGCTAAGAAGTTTTCACTGG | CTTCATTTATTTTTTCAAAAGGTAAAA |  |
| rs701265 | ACGTTGGATGCATGGAAAGGGATGTAAGAC | ACGTTGGATGCTCCTCTGAGGAGAAAATCG | caaAGCAAAAACAGTCAGTACAATGAT |  |
| rs7294 | ACGTTGGATGAAAAAAGAGCGAGCGTGTGG | ACGTTGGATGTTCTAGATTACCCCCTCCTC | cTGGTCCATTGTCATGTG |  |
| rs7626962 | ACGTTGGATGGTTCCGCTTTCCACTGCTG | ACGTTGGATGTGGAGCCAGGTGTCAGCGA | cccccATGCACTGGCCTCGGCCTCAGAG |  |
| rs776746 | ACGTTGGATGGTAATGTGGTCCAAACAGGG | ACGTTGGATGCAGCTTAACGAATGCTCTAC | TCCAAACAGGGAAGAGATA |  |
| rs890293 | ACGTTGGATGAATCCAGCGCCTGGCATCTT | ACGTTGGATGTCCCAGCAGGCGACGGTCC | cGGCACGGCTGGGAGC |  |
| rs975833 | ACGTTGGATGCAACTCACAGATTGCCTAAG | ACGTTGGATGGTGGTAGATATCATCACAA | AATTATGTGATGATGAAATTGTATG |  |
| rs9934438 | ACGTTGGATGACCTGGGCTATCCTCTGTTC | ACGTTGGATGAGTGACATGGAATCCTGACG | taccgCCCATCCTAGTCCAAG |  |
